# Supplementary material
Source: PubMed Central journal article supplement (PMC6077790)
Supplement: ocy045_supp.pdf [file ocy045_supp.pdf]

**Supplementary Table 1.** Stream 1 initial and final sort solutions.

| <b>Stream 1 – Initial sort</b>                                                   | <b>Category</b>          | <b>Stream 1 – Final sort</b>                         | <b>Category</b>          |
|----------------------------------------------------------------------------------|--------------------------|------------------------------------------------------|--------------------------|
| History and physical (admission or transfer summary)                             | Demographics and history | Weight current and admission                         | Demographics and history |
| Weight current and admission                                                     | Demographics and history | History and physical (admission or transfer summary) | Demographics and history |
|                                                                                  |                          | Patient movement                                     | Demographics and history |
| Progress notes                                                                   | Daily progress           | Progress notes                                       | Clinical notes           |
| General examination notes                                                        | Daily progress           | General examination notes                            | Clinical notes           |
| Chest x-ray, notes                                                               | Daily progress           | Abdomen examination notes                            | Clinical notes           |
| Heart rate trend over last 24 hours                                              | Daily progress           | Acute hypoxic respiratory failure                    | Clinical notes           |
| Abdomen examination notes                                                        | Daily progress           |                                                      |                          |
| Patient movement                                                                 | Daily progress           | Ejection fraction baseline and current               | Cardiovascular           |
| Acute hypoxic respiratory failure                                                | Daily progress           | Dysrhythmia presence and type                        | Cardiovascular           |
|                                                                                  |                          | ST segment changes                                   | Cardiovascular           |
| Life-threatening cardiac rhythm detected (current)                               | Cardiovascular           | SVR – systemic vascular resistance                   | Cardiovascular           |
| Ejection fraction baseline and current                                           | Cardiovascular           | Hemodynamic instability prediction/risk              | Cardiovascular           |
| Acute cardiogenic shock                                                          | Cardiovascular           | Life-threatening cardiac rhythm detected (current)   | Cardiovascular           |
| ST segment changes                                                               | Cardiovascular           | Acute cardiogenic shock                              | Cardiovascular           |
| Dysrhythmia presence and type                                                    | Cardiovascular           |                                                      |                          |
| Hemodynamic instability prediction/risk                                          | Cardiovascular           | Heart rate                                           | Flowsheet                |
|                                                                                  |                          | Heart rate trend over last 24 hours                  | Flowsheet                |
|                                                                                  |                          | Blood pressure trend over last 24 hours              | Flowsheet                |
| CI - Cardiac index                                                               | Flowsheet                | Respiratory rate                                     | Flowsheet                |
| CVP – central venous pressure                                                    | Flowsheet                | Systolic & Diastolic Blood Pressure                  | Flowsheet                |
| Fluid responsiveness                                                             | Flowsheet                | MAP - mean arterial pressure                         | Flowsheet                |
| norepinephrine 16,000mcg in sodium chloride 0.9% 250 ml 0.06 mcg/kg/min infusion | Flowsheet                | MV – minute ventilation                              | Flowsheet                |
| dobutamine 2000 mcg/ml in D5W pre-made 2 mcg/kg/min infusion                     | Flowsheet                | Oxygen saturation                                    | Flowsheet                |
| Sedation continuous infusion                                                     | Flowsheet                | Temperature                                          | Flowsheet                |
| 24 hr intake/output                                                              | Flowsheet                | CI - Cardiac index                                   | Flowsheet                |
| Blood glucose trend over last 12 hours                                           | Flowsheet                | 24 hr intake/output                                  | Flowsheet                |
| Sedation vacation time and duration plan                                         | Flowsheet                | Fluid responsiveness                                 | Flowsheet                |
| IV fluid 6 hour history                                                          | Flowsheet                | Hourly urine output                                  | Flowsheet                |
|                                                                                  |                          | CVP – central venous pressure                        | Flowsheet                |
| Nutrition delivery method and content                                            | Gastrointestinal         | Nutrition delivery method and content                | Gastrointestinal         |
|                                                                                  |                          | Bowel Regimen                                        | Gastrointestinal         |
| Chest x-ray - image                                                              | Imaging                  | Chest x-ray - image                                  | Imaging                  |
| Brain MRI (magnetic resonance imaging)                                           | Imaging                  | Chest x-ray, notes                                   | Imaging                  |
|                                                                                  |                          | Brain MRI (magnetic resonance imaging)               | Imaging                  |

|                                                                      |                    |                                                                                  |                    |
|----------------------------------------------------------------------|--------------------|----------------------------------------------------------------------------------|--------------------|
| Microbiological culture                                              | Infectious disease | Ventilator associated pneumonia prediction/risk                                  | Infectious disease |
| Ventilator associated pneumonia prediction/risk                      | Infectious disease | Antibiotics given with day of antibiotic administration                          | Infectious disease |
| WBC – white blood cell count                                         | Laboratory         | Arterial Blood Gas pH test                                                       | Laboratory         |
| Hematocrit                                                           | Laboratory         | Base deficit/excess                                                              | Laboratory         |
| Serum Potassium                                                      | Laboratory         | Hematocrit                                                                       | Laboratory         |
| Serum Sodium                                                         | Laboratory         | Serum Lactic Acid                                                                | Laboratory         |
| Blood glucose                                                        | Laboratory         | Serum Sodium                                                                     | Laboratory         |
| Arterial Blood Gas pH test                                           | Laboratory         | Serum Potassium                                                                  | Laboratory         |
| PCO2 – partial pressure of carbon dioxide                            | Laboratory         | Blood glucose                                                                    | Laboratory         |
| Serum Lactic Acid                                                    | Laboratory         | Blood glucose trend over last 12 hours                                           | Laboratory         |
| Base deficit/excess                                                  | Laboratory         | PCO2 – partial pressure of carbon dioxide                                        | Laboratory         |
| Preoperative or baseline eGFR (estimated glomerular filtration rate) | Laboratory         | Serum Albumin                                                                    | Laboratory         |
| PT – prothrombin time                                                | Laboratory         | Microbiological culture                                                          | Laboratory         |
| Serum Creatinine Kinase                                              | Laboratory         | PT – prothrombin time                                                            | Laboratory         |
|                                                                      |                    | Preoperative or baseline eGFR (estimated glomerular filtration rate)             | Laboratory         |
|                                                                      |                    | Serum Creatinine Kinase                                                          | Laboratory         |
|                                                                      |                    | WBC – white blood cell count                                                     | Laboratory         |
| Bowel Regimen                                                        | Medications        | PCO2 – Partial pressure of CO2 trend over 24-72 hours                            | Laboratory         |
| cefazolin 2 g intravenous every 8 hours                              | Medications        |                                                                                  |                    |
| prednisone 20 mg tablet 1 three times daily                          | Medications        | norepinephrine 16,000mcg in sodium chloride 0.9% 250 ml 0.06 mcg/kg/min infusion | Medications        |
| fentanyl 10 mcg/ml in NS 50 mcg/hr infusion                          | Medications        | dobutamine 2000 mcg/ml in D5W pre-made 2 mcg/kg/min infusion                     | Medications        |
| mycophenolate 500 mg tablet 1 three times daily                      | Medications        | fentanyl 10 mcg/ml in NS 50 mcg/hr infusion                                      | Medications        |
| furosemide 1mg/ml 10 mg/hr infusion                                  | Medications        | Sedation continuous infusion                                                     | Medications        |
| Medication overlap                                                   | Medications        | furosemide 1mg/ml 10 mg/hr infusion                                              | Medications        |
| Medication contraindications (eg, vasopressors and ionotropes)       | Medications        |                                                                                  |                    |
|                                                                      |                    | prednisone 20 mg tablet 1 three times daily                                      | Medications        |
|                                                                      |                    | mycophenolate 500 mg tablet 1 three times daily                                  | Medications        |
|                                                                      |                    | cefazolin 2 g intravenous every 8 hours                                          | Medications        |
|                                                                      |                    | Medication overlap                                                               | Medications        |
| GCS - Glasgow coma scale                                             | Neurologic         | Medication contraindications                                                     | Medications        |
| Cumulative neurologic medication given                               | Neurologic         |                                                                                  |                    |
|                                                                      |                    | Sedation vacation time and duration plan                                         | Neurologic         |
|                                                                      |                    | Cumulative neurologic medication given                                           | Neurologic         |
| Urine frequency and volume 24 hour history                           | Renal              | GCS - Glasgow coma scale                                                         | Neurologic         |
| CKD – chronic kidney disease                                         | Renal              | Withdrawal Symptom Score                                                         | Neurologic         |
|                                                                      |                    | IV fluid 6 hour history                                                          | Renal              |

|                                                       |             |                                                       |             |
|-------------------------------------------------------|-------------|-------------------------------------------------------|-------------|
| Acute respiratory distress prediction/risk            | Respiratory | Urine frequency and volume 24 hour history            | Renal       |
| MV – minute ventilation                               | Respiratory | CKD – chronic kidney disease                          | Renal       |
| PF ratio (PaO2/FiO2)                                  | Respiratory |                                                       |             |
| I:E – ventilator inspiratory-to-expiratory time ratio | Respiratory | PF ratio (PaO2/FiO2)                                  | Respiratory |
| Pulmonary hypertension                                | Respiratory | Cough presence and description                        | Respiratory |
|                                                       |             | Acute respiratory distress prediction/risk            | Respiratory |
| Heart rate                                            | Vitals      | I:E – ventilator inspiratory-to-expiratory time ratio | Respiratory |
| MAP - mean arterial pressure                          | Vitals      | Pulmonary hypertension                                | Respiratory |
| Oxygen saturation                                     | Vitals      | Weight current and admission                          |             |
| Temperature                                           | Vitals      |                                                       |             |
| Respiratory rate                                      | Vitals      |                                                       |             |
| SVR – systemic vascular resistance                    | Vitals      |                                                       |             |

**Supplementary Table 2.** Stream 2 initial and final sort solutions.

| <b>Stream 2 – Initial</b>                            | <b>Category</b>    | <b>Stream 2 – Final</b>                                                          |                  |
|------------------------------------------------------|--------------------|----------------------------------------------------------------------------------|------------------|
| Ejection fraction baseline and current               | Cardiovascular     | Serum Lactic Acid                                                                | Cardiovascular   |
| CI – cardiac index                                   | Cardiovascular     | Life-threatening cardiac rhythm detected (current)                               | Cardiovascular   |
| CVP – central venous pressure                        | Cardiovascular     | Dysrhythmia presence and type                                                    | Cardiovascular   |
| Dysrhythmia presence and type                        | Cardiovascular     | ST segment changes                                                               | Cardiovascular   |
| SVR – systemic vascular resistance                   | Cardiovascular     | IV fluid 6 hour history                                                          | Cardiovascular   |
| ST segment changes                                   | Cardiovascular     | Ejection fraction baseline and current                                           | Cardiovascular   |
| MAP – Mean arterial pressure                         | Cardiovascular     | Pulmonary hypertension                                                           | Cardiovascular   |
| Heart rate                                           | Cardiovascular     |                                                                                  |                  |
| IV fluid 6 hour history                              | Cardiovascular     | General examination notes                                                        | Demographics     |
| Serum Lactic Acid                                    | Cardiovascular     |                                                                                  |                  |
| Fluid responsiveness                                 | Cardiovascular     | Abdomen examination notes                                                        | Gastrointestinal |
| Weight current and at admission                      | Cardiovascular     | Nutrition delivery method and content                                            | Gastrointestinal |
|                                                      |                    | Bowel Regimen                                                                    | Gastrointestinal |
| History and physical (admission or transfer summary) | Demographics       |                                                                                  |                  |
|                                                      |                    | Hematocrit                                                                       | Hematologic      |
| Blood glucose                                        | Gastrointestinal   | PT – prothrombin time                                                            | Hematologic      |
| Blood glucose trend                                  | Gastrointestinal   |                                                                                  |                  |
| Bowel Regimen                                        | Gastrointestinal   | Acute cardiogenic shock                                                          | Hemodynamics     |
| Serum Albumin                                        | Gastrointestinal   | Input & Output                                                                   | Hemodynamics     |
|                                                      |                    | Heart rate                                                                       | Hemodynamics     |
| Hematocrit                                           | Hematologic        | Heart rate trend over last 12 hours                                              | Hemodynamics     |
| PT – prothrombin time                                | Hematologic        | MAP - mean arterial pressure                                                     | Hemodynamics     |
|                                                      |                    | CVP – central venous pressure                                                    | Hemodynamics     |
| Temperature                                          | Infectious disease | CI - Cardiac index                                                               | Hemodynamics     |
| WBC – white blood cell count                         | Infectious disease | Hemodynamic instability prediction/risk                                          | Hemodynamics     |
| Microbiological Culture                              | Infectious disease | dobutamine 2000 mcg/ml in D5W pre-made 2 mcg/kg/min infusion                     | Hemodynamics     |
|                                                      |                    | norepinephrine 16,000mcg in sodium chloride 0.9% 250 ml 0.06 mcg/kg/min infusion | Hemodynamics     |

|                                                                      |            |                                                                      |                    |
|----------------------------------------------------------------------|------------|----------------------------------------------------------------------|--------------------|
| Cumulative neurological medication given                             | Neurologic | Blood glucose trend over last 48 hours                               | Hemodynamics       |
| GCS – Glasgow Coma Scale                                             | Neurologic | Blood glucose                                                        | Hemodynamics       |
| Patient movement                                                     | Neurologic | SVR – systemic vascular resistance                                   | Hemodynamics       |
|                                                                      |            | Base deficit/excess                                                  | Hemodynamics       |
| PF ratio (PaO2/FiO2)                                                 | Pulmonary  | Fluid responsiveness                                                 | Hemodynamics       |
| 24 hr Intake/Output                                                  | Renal      | Temperature                                                          | Infectious disease |
| Serum Sodium                                                         | Renal      | WBC – white blood cell count                                         | Infectious disease |
| Serum Potassium                                                      | Renal      | Microbiological culture                                              | Infectious disease |
| Preoperative or baseline eGFR (estimated glomerular filtration rate) | Renal      | days on antibiotic                                                   | Infectious disease |
| Urine frequency and volume 24 hour history                           | Renal      |                                                                      |                    |
|                                                                      |            | GCS - Glasgow coma scale                                             | Neurologic         |
| Abdomen Examination notes                                            | unsorted   | Patient movement                                                     | Neurologic         |
| Acute respiratory distress prediction                                | unsorted   | Cumulative neurologic medication given                               | Neurologic         |
| Arterial Blood Gas pH test                                           | unsorted   | Sedation continuous infusion                                         | Neurologic         |
| Base deficit/excess                                                  | unsorted   | Sedation vacation time and duration plan                             | Neurologic         |
| Brain MRI (magnetic resonance imaging)                               | unsorted   | Brain MRI (magnetic resonance imaging)                               | Neurologic         |
| Chest x-ray - image                                                  | unsorted   | CT head                                                              | Neurologic         |
| Cough presence and description                                       | unsorted   |                                                                      |                    |
| General examination notes                                            | unsorted   | Preoperative or baseline eGFR (estimated glomerular filtration rate) | Pharmacy           |
| Heart rate                                                           | unsorted   | Medication overlap                                                   | Pharmacy           |
| Hemodynamic instability prediction                                   | unsorted   | mycophenolate 500 mg tablet 1 three times daily                      | Pharmacy           |
| I:E – ventilator inspiratory-to-expiratory time ratio                | unsorted   | prednisone 20 mg tablet 1 three times daily                          | Pharmacy           |
| Life-threatening cardiac rhythm detected (current)                   | unsorted   | Medication contraindications                                         | Pharmacy           |
| Medication contraindications                                         | unsorted   | fentanyl 10 mcg/ml in NS 50 mcg/hr infusion                          | Pharmacy           |
| Medication overlap                                                   | unsorted   |                                                                      |                    |
| MV – minute ventilation                                              | unsorted   | History and physical (admission or transfer summary)                 | Progress Note      |
| Nutrition delivery method and content                                | unsorted   |                                                                      |                    |
| Oxygen saturation                                                    | unsorted   | 24 hr intake/output                                                  | Pulmonary          |
| PCO2 – partial pressure of carbon dioxide                            | unsorted   | Acute hypoxic respiratory failure                                    | Pulmonary          |
| Progress notes                                                       | unsorted   | Respiratory rate                                                     | Pulmonary          |
| Respiratory rate                                                     | unsorted   | FiO2                                                                 | Pulmonary          |
| Sedation continuous infusion                                         | unsorted   | Oxygen saturation                                                    | Pulmonary          |
| Sedation vacation time and duration plan                             | unsorted   | Oxygenation Index                                                    | Pulmonary          |
| Serum Creatinine Kinase                                              | unsorted   | Arterial Blood Gas pH test                                           | Pulmonary          |
| Ventilator associated pneumonia prediction                           | unsorted   | Chest x-ray - image                                                  | Pulmonary          |
| Acute cardiogenic shock                                              | unsorted   | PCO2 – partial pressure of carbon dioxide                            | Pulmonary          |
| Acute hypoxic respiratory failure                                    | unsorted   | Chest x-ray, notes                                                   | Pulmonary          |
| CKD – chronic kidney disease                                         | unsorted   | I:E – ventilator inspiratory-to-expiratory time ratio                | Pulmonary          |
|                                                                      |            | Acute respiratory distress prediction/risk                           | Pulmonary          |
|                                                                      |            | Ventilator associated pneumonia prediction/risk                      | Pulmonary          |
|                                                                      |            | MV – minute ventilation                                              | Pulmonary          |

|                                            |           |
|--------------------------------------------|-----------|
| PF ratio (PaO2/FiO2)                       | Pulmonary |
| Cough presence and description             | Pulmonary |
| Weight current and admission               | Renal     |
| Serum Creatinine                           | Renal     |
| Serum Sodium                               | Renal     |
| Serum Potassium                            | Renal     |
| Urine frequency and volume 24 hour history | Renal     |
| Serum Albumin                              | Renal     |
| CKD – chronic kidney disease               | Renal     |
| furosemide 1mg/ml 10 mg/hr infusion        | Renal     |
| cefazolin 2 g intravenous every 8 hours    | unsorted  |
| Progress notes                             | unsorted  |

**Supplementary Table 3.** Stream 3 initial and final sort solutions.

| <b>Stream 3 – Initial</b>                          | <b>Category</b>             | <b>Stream 3 – Final</b>                              | <b>Category</b>             |
|----------------------------------------------------|-----------------------------|------------------------------------------------------|-----------------------------|
| History and physical                               | AdmissionData/Demographics  | Temperature                                          | Admission data/demographics |
| Patient movement                                   | AdmissionData/Demographics  | Respiratory rate                                     | Admission data/demographics |
| Cough presence and description                     | AdmissionData/Demographics  | Oxygen saturation                                    | Admission data/demographics |
| GCS – Glasgow Coma Scale                           | AdmissionData/Demographics  | Weight current and admission                         | Admission data/demographics |
| Temperature                                        | AdmissionData/Demographics  | History and physical (admission or transfer summary) | Admission data/demographics |
| Weight current and at admission                    | AdmissionData/Demographics  | Cough presence and description                       | Admission data/demographics |
| Progress notes                                     | Daily Progress/Problem List | General examination notes                            | Daily progress/problem list |
| General examination notes                          | Daily Progress/Problem List | Progress notes                                       | Daily progress/problem list |
| IV fluid 6 hour history                            | Daily Progress/Problem List | Acute cardiogenic shock                              | Daily progress/problem list |
| Urine frequency and volume 24 hour history         | Daily Progress/Problem List | Pulmonary hypertension                               | Daily progress/problem list |
| 24 hr Intake/Output                                | Daily Progress/Problem List | CKD – chronic kidney disease                         | Daily progress/problem list |
| Sedation vacation time and duration plan           | Daily Progress/Problem List | Abdomen examination notes                            | Daily progress/problem list |
| Dysrhythmia presence and type                      | Hemodynamic Monitoring      | Life-threatening cardiac rhythm detected (current)   | Hemodynamic monitoring      |
| Life-threatening cardiac rhythm detected (current) | Hemodynamic Monitoring      | MAP - mean arterial pressure                         | Hemodynamic monitoring      |
| ST segment changes                                 | Hemodynamic Monitoring      | Heart rate                                           | Hemodynamic monitoring      |
| Heart rate trend over last 24 hours                | Hemodynamic Monitoring      | Heart rate trend over last 12 hours                  | Hemodynamic monitoring      |
| Heart rate                                         | Hemodynamic Monitoring      | Fluid responsiveness                                 | Hemodynamic monitoring      |
| MAP – Mean arterial pressure                       | Hemodynamic Monitoring      | Dysrhythmia presence and type                        | Hemodynamic monitoring      |
| Fluid responsiveness                               | Hemodynamic Monitoring      | ST segment changes                                   | Hemodynamic monitoring      |
| CI – cardiac index                                 | Hemodynamic Monitoring      | CVP – central venous pressure                        | Hemodynamic monitoring      |

|                                                                      |                        |                                                                                  |                         |
|----------------------------------------------------------------------|------------------------|----------------------------------------------------------------------------------|-------------------------|
| Hemodynamic instability prediction                                   | Hemodynamic Monitoring | Ejection fraction baseline and current                                           | Hemodynamic monitoring  |
| Ejection fraction baseline and current                               | Hemodynamic Monitoring | CI - Cardiac index                                                               | Hemodynamic monitoring  |
| SVR – systemic vascular resistance                                   | Hemodynamic Monitoring | SVR – systemic vascular resistance                                               | Hemodynamic monitoring  |
| CVP – central venous pressure                                        | Hemodynamic Monitoring | Hemodynamic instability prediction/risk                                          | Hemodynamic monitoring  |
| Brain MRI (magnetic resonance imaging)                               | Imaging                | Chest x-ray - image                                                              | Imaging                 |
| Hematocrit                                                           | Laboratory             | Chest x-ray, notes                                                               | Imaging                 |
| WBC – white blood cell count                                         | Laboratory             | Brain MRI (magnetic resonance imaging)                                           | Imaging                 |
| Serum Sodium                                                         | Laboratory             | Microbiological culture                                                          | Immunology and oncology |
| Serum Potassium                                                      | Laboratory             | Prior Microbial Cultures                                                         | Immunology and oncology |
| Blood glucose                                                        | Laboratory             | Temperature                                                                      | Immunology and oncology |
| Serum Albumin                                                        | Laboratory             | WBC – white blood cell count                                                     | Immunology and oncology |
| Blood glucose trend over last 12 hours                               | Laboratory             | Antibiotic history                                                               | Immunology and oncology |
| Preoperative or baseline eGFR (estimated glomerular filtration rate) | Laboratory             |                                                                                  |                         |
| Serum Lactic Acid                                                    | Laboratory             | CBC with Differential                                                            | Laboratory              |
| PT – prothrombin time                                                | Laboratory             | Base deficit/excess                                                              | Laboratory              |
| Microbiological Culture                                              | Laboratory             | Serum Sodium                                                                     | Laboratory              |
| Medication contraindications                                         | Medications            | Serum Potassium                                                                  | Laboratory              |
| Cumulative neurological medication given                             | Medications            | Serum Creatinine                                                                 | Laboratory              |
| Sedation continuous infusion                                         | Medications            | Serum Albumin                                                                    | Laboratory              |
| Bowel Regimen                                                        | Medications            | Serum Lactic Acid                                                                | Laboratory              |
| Medication overlap                                                   | Medications            | Blood glucose                                                                    | Laboratory              |
| Acute respiratory distress prediction                                | Respiratory            | PT – prothrombin time                                                            | Laboratory              |
| Ventilator associated pneumonia prediction                           | Respiratory            | Blood glucose trend over last 48 hours                                           | Laboratory              |
| I:E – ventilator inspiratory-to-expiratory time ratio                | Respiratory            | Medication contraindications                                                     | Medications             |
| MV – minute ventilation                                              | Respiratory            | norepinephrine 16,000mcg in sodium chloride 0.9% 250 ml 0.06 mcg/kg/min infusion | Medications             |
| PF ratio (PaO2/FiO2)                                                 | Respiratory            | dobutamine 2000 mcg/ml in D5W pre-made 2 mcg/kg/min infusion                     | Medications             |
| Oxygen saturation                                                    | Respiratory            | Sedation continuous infusion                                                     | Medications             |
| Abdomen examination notes                                            | unsorted               | Sedation vacation time and duration                                              | Medications             |
| Arterial Blood Gas pH test                                           | unsorted               | plan                                                                             | Medications             |
| Base deficit/excess                                                  | unsorted               | fentanyl 10 mcg/ml in NS 50 mcg/hr infusion                                      | Medications             |
| Chest x-ray - image                                                  | unsorted               | Cumulative neurologic medication given                                           | Medications             |
| Chest x-ray, notes                                                   | unsorted               | Bowel Regimen                                                                    | Medications             |
| Nutrition delivery method and content                                | unsorted               | prednisone 20 mg tablet 1 three times daily                                      | Medications             |
| Respiratory rate                                                     | unsorted               | cefazolin 2 g intravenous every 8 hours                                          | Medications             |
|                                                                      |                        | mycophenolate 500 mg tablet 1 three times daily                                  | Medications             |
|                                                                      |                        | furosemide 1mg/ml 10 mg/hr infusion                                              | Medications             |
|                                                                      |                        | Medication overlap                                                               | Medications             |

Reese et al, JAMIA, 2018

Reese, TJ, Segall, N, Nesbitt, P, Del Fiol, G, Waller, R, Macpherson, BC, Tonna, JE, Wright, MC. Patient Information Organization in the Intensive Care Setting: Expert Knowledge Elicitation with Card Sorting Methods, Supplement

|                                                                                  |                             |                                                                      |                  |
|----------------------------------------------------------------------------------|-----------------------------|----------------------------------------------------------------------|------------------|
| Serum Creatinine                                                                 | unsorted                    | GCS - Glasgow coma scale                                             | Neurology        |
| Acute cardiogenic shock                                                          | unsorted                    | ICP                                                                  | Neurology        |
| Acute hypoxic respiratory failure                                                | unsorted                    |                                                                      |                  |
| CKD – chronic kidney disease                                                     | unsorted                    | 24 hr intake/output                                                  | Nutrition and GI |
| Pulmonary hypertension                                                           | unsorted                    | IV fluid 6 hour history                                              | Nutrition and GI |
| furosemide 1mg/ml 10 mg/hr infusion                                              | unsorted                    | Urine frequency and volume 24 hour history                           | Nutrition and GI |
| dobutamine 2000 mcg/ml in D5W pre-made 2 mcg/kg/min infusion                     | unsorted                    | Nutrition delivery method and content                                | Nutrition and GI |
| norepinephrine 16,000mcg in sodium chloride 0.9% 250 ml 0.06 mcg/kg/min infusion | unsorted                    | Preoperative or baseline eGFR (estimated glomerular filtration rate) | Nutrition and GI |
| mycophenolate 500 mg tablet 1 three times daily                                  | unsorted                    |                                                                      |                  |
| fentanyl 10 mcg/ml in NS 50 mcg/hr infusion                                      | unsorted                    | Arterial Blood Gas pH test                                           | Respiratory      |
| prednisone 20 mg tablet 1 three times daily                                      | unsorted                    | Acute hypoxic respiratory failure                                    | Respiratory      |
| cefazolin 2 g intravenous every 8 hours                                          | unsorted                    | MV – minute ventilation                                              | Respiratory      |
| History and physical                                                             | AdmissionData/Demographics  | PF ratio (PaO2/FiO2)                                                 | Respiratory      |
| Patient movement                                                                 | AdmissionData/Demographics  | Ventilator associated pneumonia prediction/risk                      | Respiratory      |
| Cough presence and description                                                   | AdmissionData/Demographics  | Acute respiratory distress prediction/risk                           | Respiratory      |
| GCS – Glasgow Coma Scale                                                         | AdmissionData/Demographics  | I:E – ventilator inspiratory-to-expiratory time ratio                | Respiratory      |
| Temperature                                                                      | AdmissionData/Demographics  |                                                                      |                  |
| Weight current and at admission                                                  | AdmissionData/Demographics  |                                                                      |                  |
| Progress notes                                                                   | Daily Progress/Problem List |                                                                      |                  |
| General examination notes                                                        | Daily Progress/Problem List |                                                                      |                  |
| IV fluid 6 hour history                                                          | Daily Progress/Problem List |                                                                      |                  |
| Urine frequency and volume 24 hour history                                       | Daily Progress/Problem List |                                                                      |                  |
| 24 hr Intake/Output                                                              | Daily Progress/Problem List |                                                                      |                  |
| Sedation vacation time and duration plan                                         | Daily Progress/Problem List |                                                                      |                  |
